# Supplementary material
Source: PubMed Central journal article supplement (PMC2679307)
Supplement: emm-40-208-s001.pdf [file emm-40-208-s001.pdf]

Gene expression altered by kaempferol treatment in HaCaT keratinocytes

| GenBank No | Name                                                                           | Symbol | Function                         | Cluster | Fold change |      |      |
|------------|--------------------------------------------------------------------------------|--------|----------------------------------|---------|-------------|------|------|
|            |                                                                                |        |                                  |         | 3h          | 6h   | 24h  |
| BM787728   | Actinin, alpha 1                                                               | ACTN1  | cell adhesion and cytoskeleton   | 2       | -2.5        | -1.2 | -1.4 |
| BM793646   | Desmoglein 2                                                                   | DSG2   | cell adhesion and cytoskeleton   | 2       | -2.4        | -1.1 | -1.5 |
| BF694858   | Formin binding protein 4                                                       | FNBP4  | cell adhesion and cytoskeleton   | 2       | -2.4        | -1.2 | -1.4 |
| BQ417219   | Glycoprotein V (platelet)                                                      | GP5    | cell adhesion and cytoskeleton   | 2       | -2.7        | -1.1 | -1.4 |
| BG752932   | Neurofibromin 2 (bilateral acoustic neuroma)                                   | NF2    | cell adhesion and cytoskeleton   | 2       | -2.4        | -1.1 | -1.5 |
| BM925356   | Stomatin                                                                       | STOM   | cell adhesion and cytoskeleton   | 2       | -2.2        | -1.2 | -1.4 |
| BM750409   | Adaptor protein containing pH domain, PTB domain and leucine zipper motif 1    | APPL   | cell cycle                       | 2       | -2.4        | -1.3 | -1.5 |
| BQ082207   | Cell division cycle 2-like 5 (cholinesterase-related cell division controller) | CDC2L5 | cell cycle                       | 2       | -2.5        | -1.3 | -1.5 |
| BM783064   | Radical fringe homolog (Drosophila)                                            | RFNG   | cell cycle                       | 2       | -2.5        | -1.2 | -1.2 |
| BM752799   | S-phase kinase-associated protein 2 (p45)                                      | SKP2   | cell cycle                       | 2       | -2.2        | -1.7 | -1.6 |
| BM755446   | Thioredoxin-like 4B                                                            | TXNL4B | cell cycle                       | 2       | -2.2        | -1.3 | -1.6 |
| BM748933   | Endoplasmic reticulum thioredoxin superfamily member, 18 kDa                   | TLP19  | cell redox homeostasis           | 1       | 1.2         | 1.0  | 2.1  |
| BM749654   | Peroxiredoxin 3                                                                | PRDX3  | cell redox homeostasis           | 1       | 1.4         | 1.2  | 3.4  |
| BM789388   | Thioredoxin reductase 1                                                        | TXNRD1 | cell redox homeostasis           | 1       | 1.2         | 3.8  | 2.8  |
| AI022345   | Thioredoxin reductase 1                                                        | TXNRD1 | cell redox homeostasis           | 1       | 1.4         | 2.9  | 1.9  |
| BE872273   | Nucleoredoxin                                                                  | NXN    | cell redox homeostasis           | 2       | -2.3        | -1.1 | -1.3 |
| BM761603   | FOS-like antigen 1                                                             | FOSL1  | defense and immune response      | 1       | -1.2        | 2.1  | 2.5  |
| BM759589   | Stress-induced-phosphoprotein 1 (Hsp70/Hsp90-organizing protein)               | STIP1  | defense and immune response      | 2       | -2.7        | -1.3 | -1.5 |
| BM786490   | DEAD (Asp-Glu-Ala-Asp) box polypeptide 51                                      | DDX51  | DNA modification and replication | 2       | -2.4        | -1.3 | -1.6 |
| BM787857   | Origin recognition complex, subunit 6 homolog-like (yeast)                     | ORC6L  | DNA modification and replication | 2       | -2.3        | -1.2 | -1.4 |

**Gene expression altered by kaempferol treatment in HaCaT keratinocytes**

| GenBank No | Name                                                                                                                                   | Symbol | Function                         | Cluster | 3h   | 6h   | 24h  |
|------------|----------------------------------------------------------------------------------------------------------------------------------------|--------|----------------------------------|---------|------|------|------|
| BM757481   | Polymerase (DNA directed) nu                                                                                                           | POLN   | DNA modification and replication | 2       | -2.3 | -1.1 | -1.4 |
| BM787623   | Topoisomerase (DNA) II binding protein 1                                                                                               | TOPBP1 | DNA modification and replication | 2       | -2.5 | -1.3 | -1.4 |
| BM793025   | Topoisomerase (DNA) III alpha                                                                                                          | TOP3A  | DNA modification and replication | 2       | -2.1 | -1.3 | -1.6 |
| BM756089   | Clusterin (complement lysis inhibitor, SP-40,40, sulfated glycoprotein 2, testosterone-repressed prostate message 2, apolipoprotein J) | CLU    | defense and immune response      | 1       | 1.2  | 1.2  | 2.3  |
| AF027706   | Receptor-interacting serine-threonine kinase 2                                                                                         | RIPK2  | defense and immune response      | 1       | 1.9  | 1.4  | 3.3  |
| BM757316   | Sp2 transcription factor                                                                                                               | SP2    | defense and immune response      | 1       | 1.4  | 1.4  | 2.6  |
| BM791916   | Cathepsin S                                                                                                                            | CTSS   | defense and immune response      | 2       | -2.1 | -1.1 | -1.4 |
| BM751205   | CD68 antigen                                                                                                                           | CD68   | defense and immune response      | 2       | -2.2 | -1.2 | -1.5 |
| BM785914   | Glucose phosphate isomerase                                                                                                            | GPI    | defense and immune response      | 2       | -2.1 | -1.1 | -1.4 |
| BM784811   | Interferon (alpha, beta and omega) receptor 1                                                                                          | IFNAR1 | defense and immune response      | 2       | -2.5 | -1.5 | -1.6 |
| BM750766   | Nuclear factor of kappa light polypeptide gene enhancer in B-cells 2 (p49/p100)                                                        | NFKB2  | defense and immune response      | 2       | -2.3 | -1.2 | -1.4 |
| BM761120   | Nuclear factor of kappa light polypeptide gene enhancer in B-cells inhibitor, beta                                                     | NFKBIB | defense and immune response      | 2       | -2.4 | -1.3 | -1.5 |
| BM786517   | Signal transducer and activator of transcription 3 (acute-phase response factor)                                                       | STAT3  | defense and immune response      | 2       | -2.2 | -1.2 | -1.4 |
| BM742118   | Signal transducer and activator of transcription 3 (acute-phase response factor)                                                       | STAT3  | defense and immune response      | 2       | -2.8 | -1.2 | -1.6 |
| BM741126   | Transcription factor 7 (T-cell specific, HMG-box)                                                                                      | TCF7   | defense and immune response      | 2       | -2.1 | -1.3 | -1.4 |
| BM794187   | Interferon, alpha-inducible protein (clone IFI-15K)                                                                                    | G1P2   | defense and immune response      | 3       | -1.4 | -1.7 | -2.6 |
| BM790031   | Interferon-induced protein with tetratricopeptide repeats 3                                                                            | IFIT3  | defense and immune response      | 3       | -1.0 |      | -3.3 |
| BM763771   | Toll-like receptor adaptor molecule 1                                                                                                  | TRIF   | defense and immune response      | 3       | -1.4 | -1.5 | -2.0 |
| BM759632   | Adaptor-related protein complex 1, mu 1 subunit                                                                                        | AP1M1  | intracellular transport          | 1       | 1.4  | -1.0 | 2.7  |
| BM758517   | Adaptor-related protein complex 1, sigma 3 subunit                                                                                     | AP1S3  | intracellular transport          | 2       | -2.7 | -1.3 | -1.5 |
| BM750940   | Adaptor-related protein complex 3, sigma 2 subunit                                                                                     | AP3S2  | intracellular transport          | 2       | -2.6 | -1.2 | -1.5 |

**Gene expression altered by kaempferol treatment in HaCaT keratinocytes**

| GenBank No | Name                                                                                                                                             | Symbol  | Function                | Cluster | 3h   | 6h   | 24h  |
|------------|--------------------------------------------------------------------------------------------------------------------------------------------------|---------|-------------------------|---------|------|------|------|
| BX647920   | Golgi autoantigen, golgin subfamily a, 2                                                                                                         | GOLGA2  | intracellular transport | 2       | -2.5 | -1.2 | -1.5 |
| BX105880   | Intersectin 2                                                                                                                                    | ITSN2   | intracellular transport | 2       | -2.6 | -1.0 | -1.3 |
| BI038938   | Myosin, heavy polypeptide 9, non-muscle                                                                                                          | MYH9    | intracellular transport | 2       | -2.2 | -1.3 | -1.4 |
| BM750459   | Nudix (nucleoside diphosphate linked moiety X)-type motif 4                                                                                      | NUDT4   | intracellular transport | 2       | -2.4 | -1.2 | -1.4 |
| BM785614   | Protective protein for beta-galactosidase (galactosialidosis)                                                                                    | PPGB    | intracellular transport | 2       | -2.5 | -1.3 | -1.6 |
| CB104873   | RAB1B, member RAS oncogene family                                                                                                                | RAB1B   | intracellular transport | 2       | -2.8 | -1.3 | -1.5 |
| NM_014999  | RAB21, member RAS oncogene family                                                                                                                | RAB21   | intracellular transport | 2       | -2.5 | -1.1 | -1.4 |
| AI379719   | Sorting nexin 5                                                                                                                                  | SNX5    | intracellular transport | 2       | -2.5 | -1.3 | -1.5 |
| AK126465   | Trans-golgi network protein 2                                                                                                                    | TGOLN2  | intracellular transport | 2       | -2.5 | -1.2 | -1.3 |
| BM794327   | Insulin induced gene 1                                                                                                                           | INSIG1  | metablism               | 3       | -1.3 | -1.8 | -2.1 |
| BM767910   | Aldehyde dehydrogenase 3 family, memberA1                                                                                                        | ALDH3A1 | metabolism              | 1       | 1.5  | 1.3  | 2.7  |
| BM738976   | Aldo-keto reductase family 1, member C2 (dihydrodiol dehydrogenase 2; bile acid binding protein; 3-alpha hydroxysteroid dehydrogenase, type III) | AKR1C1  | metabolism              | 1       | 1.5  | 1.5  | 3.2  |
| BM772580   | Aldo-keto reductase family 1, member C3 (3-alpha hydroxysteroid dehydrogenase, type II)                                                          | AKR1C3  | metabolism              | 1       | 1.7  | 1.4  | 4.3  |
| BM749464   | Phosphate cytidyltransferase 2, ethanolamine                                                                                                     | PCYT2   | metabolism              | 1       | 1.1  | 1.3  | 2.5  |
| BM787682   | 5'-nucleotidase, cytosolic II                                                                                                                    | NT5C2   | metabolism              | 2       | -2.1 | -1.3 | -1.2 |
| BM789270   | Aldehyde dehydrogenase 1 family, member B1                                                                                                       | ALDH1B1 | metabolism              | 2       | -2.2 | -1.3 | -1.4 |
| AK123877   | Aldehyde dehydrogenase 3 family, member A2                                                                                                       | ALDH3A2 | metabolism              | 2       | -2.3 | -1.2 | -1.4 |
| AW674711   | Fucokinase                                                                                                                                       | FUK     | metabolism              | 2       | -2.1 | -1.1 | -1.5 |
| AF145023   | Hydroxysteroid (17-beta) dehydrogenase 7                                                                                                         | HSD17B7 | metabolism              | 2       | -2.2 | -1.1 | -1.4 |
| CK005113   | Isocitrate dehydrogenase 1 (NADP+), soluble                                                                                                      | IDH1    | metabolism              | 2       | -2.3 | -1.1 | -1.5 |
| BM751331   | Isopentenyl-diphosphate delta isomerase 2                                                                                                        | IDI2    | metabolism              | 2       | -2.2 | -1.3 | -1.5 |

**Gene expression altered by kaempferol treatment in HaCaT keratinocytes**

| GenBank No | Name                                                                                                                  | Symbol   | Function                              | Cluster | 3h   | 6h   | 24h  |
|------------|-----------------------------------------------------------------------------------------------------------------------|----------|---------------------------------------|---------|------|------|------|
| BM786493   | Lipase, member H                                                                                                      | LIPH     | metabolism                            | 2       | -2.3 | -1.0 | -1.2 |
| NM_000239  | Lysozyme (renal amyloidosis)                                                                                          | LYZ      | metabolism                            | 2       | -2.5 | -1.2 | -1.5 |
| BM790413   | Acetyl-Coenzyme A synthetase 2 (ADP forming)                                                                          | ACAS2    | metabolism                            | 3       | -1.3 | -1.6 | -2.8 |
| BM788852   | Lysozyme (renal amyloidosis)                                                                                          | LYZ      | metabolism                            | 2       | -2.5 | -1.0 | -1.2 |
| BM743201   | ATP citrate lyase                                                                                                     | ACLY     | metabolism                            | 3       | -1.0 | -2.0 | -2.3 |
| BM763995   | Eukaryotic translation elongation factor 1 alpha 1                                                                    | EEF1A1   | protein biosynthesis and modification | 1       | -1.2 | 2.2  | 2.2  |
| BM745910   | Alanyl-tRNA synthetase like                                                                                           | AARSL    | protein biosynthesis and modification | 2       | -2.5 | -1.2 | -1.6 |
| AL039930   | Deltex homolog 2 (Drosophila)                                                                                         | DTX2     | protein biosynthesis and modification | 2       | -2.5 | -1.3 | -1.5 |
| BM785042   | Methionyl-tRNA formyltransferase, mitochondrial                                                                       | MtFMT    | protein biosynthesis and modification | 2       | -2.1 | -1.1 | -1.5 |
| BM782100   | Parkinson disease (autosomal recessive, juvenile) 2, parkin                                                           | PARK2    | protein biosynthesis and modification | 2       | -2.4 | -1.3 | -1.7 |
| BC030707   | Peptidylprolyl isomerase D (cyclophilin D)                                                                            | PPID     | protein biosynthesis and modification | 2       | -2.4 | -1.2 | -1.5 |
| BC013423   | Procollagen-proline, 2-oxoglutarate 4-dioxygenase (proline 4-hydroxylase), alpha polypeptide II                       | P4HA2    | protein biosynthesis and modification | 2       | -2.4 | -1.2 | -1.6 |
| BM784581   | Serine (or cysteine) proteinase inhibitor, clade A (alpha-1 antiproteinase, antitrypsin), member 1                    | SERPINA1 | protein biosynthesis and modification | 2       | -2.0 | -1.2 | -1.5 |
| BX449079   | Serine (or cysteine) proteinase inhibitor, clade F (alpha-2 antiplasmin, pigment epithelium derived factor), member 2 | SERPINF2 | protein biosynthesis and modification | 2       | -2.9 | -1.2 | -1.6 |
| BM745603   | Source of immunodominant MHC-associated peptides                                                                      | SIMP     | protein biosynthesis and modification | 2       | -2.6 | -1.2 | -1.4 |
| BM773413   | Proteasome (prosome, macropain) 26S subunit, non-ATPase, 14                                                           | PSMD14   | protein biosynthesis and modification | 2       | -2.1 | -1.3 | -1.3 |
| BM750445   | Transmembrane protease, serine 3                                                                                      | TMPRSS3  | protein biosynthesis and modification | 2       | -2.3 | -1.4 | -1.5 |
| BM769452   | 2'-5'-oligoadenylate synthetase-like                                                                                  | OASL     | protein biosynthesis and modification | 3       | -1.4 | -2.1 | -3.4 |
| BM784305   | Heat shock 27kDa protein 1                                                                                            | HSPB1    | protein biosynthesis and modification | 3       | -1.1 | -1.6 | -2.5 |
| BM739650   | Tryptophanyl-tRNA synthetase                                                                                          | WARS     | protein biosynthesis and modification | 3       | -1.4 | -1.7 | -2.7 |
| BM757476   | Tryptophanyl-tRNA synthetase                                                                                          | WARS     | protein biosynthesis and modification | 3       | -1.5 | -1.4 | -2.5 |

**Gene expression altered by kaempferol treatment in HaCaT keratinocytes**

| GenBank No | Name                                                                  | Symbol   | Function                              | Cluster | 3h   | 6h   | 24h  |
|------------|-----------------------------------------------------------------------|----------|---------------------------------------|---------|------|------|------|
| BM782879   | Ubiquitin specific protease 9, X-linked (fat facets-like, Drosophila) | USP9X    | protein biosynthesis and modification | 3       | 1.1  | -1.7 | -2.5 |
| BM749499   | Exosome component 8                                                   | EXOSC8   | RNA processing                        | 1       | 1.8  | 1.2  | 3.1  |
| BM750408   | LUC7-like (S. cerevisiae)                                             | LUC7L    | RNA processing                        | 2       | -2.4 | -1.3 | -1.5 |
| W72860     | Ankyrin repeat and SOCS box-containing 8                              | ASB8     | signal transduction                   | 2       | -2.4 | -1.3 | -1.4 |
| BM787149   | Calcium binding protein P22                                           | CHP      | signal transduction                   | 2       | -2.3 | -1.4 | -1.4 |
| BQ321472   | Calcium/calmodulin-dependent protein kinase kinase 2, beta            | CAMKK2   | signal transduction                   | 2       | -2.9 | -1.2 | -1.4 |
| BM740193   | Calcium/calmodulin-dependent serine protein kinase (MAGUK family)     | CASK     | signal transduction                   | 2       | -2.2 | -1.2 | -1.5 |
| BM751912   | Casein kinase 1, gamma 1                                              | CSNK1G1  | signal transduction                   | 2       | -2.6 | -1.3 | -1.5 |
| BM761773   | Caveolin 2                                                            | CAV2     | signal transduction                   | 2       | -2.5 | -1.3 | -1.6 |
| BE155243   | G protein-coupled receptor kinase interactor 2                        | GIT2     | signal transduction                   | 2       | -2.4 | -1.2 | -1.6 |
| BM786945   | LIM and senescent cell antigen-like domains 1                         | LIMS1    | signal transduction                   | 2       | -2.2 | -1.1 | -1.2 |
| AL110164   | LIM and senescent cell antigen-like domains 1                         | LIMS1    | signal transduction                   | 2       | -3.1 | -1.2 | -1.5 |
| BM790133   | Phosphatidylinositol 4-kinase, catalytic, beta polypeptide            | PIK4CB   | signal transduction                   | 2       | -2.7 | -1.2 | -1.6 |
| BM767282   | Phospholipase A2-activating protein                                   | PLAA     | signal transduction                   | 2       | -2.1 | -1.1 | -1.4 |
| BM772207   | Phospholipase A2-activating protein                                   | PLAA     | signal transduction                   | 2       | -2.0 | -1.3 | -1.4 |
| BM785608   | Protein kinase, AMP-activated, gamma 2 non-catalytic subunit          | PRKAG2   | signal transduction                   | 2       | -2.2 | -1.2 | -1.5 |
| BM787878   | PTK2 protein tyrosine kinase 2                                        | PTK2     | signal transduction                   | 2       | -2.1 | -1.1 | -1.4 |
| BM793147   | RAS protein activator like 1 (GAP1 like)                              | RASAL1   | signal transduction                   | 2       | -2.1 | -1.2 | -1.4 |
| BX648337   | RasGEF domain family, member 1B                                       | RASGEF1B | signal transduction                   | 2       | -2.4 | -1.2 | -1.5 |
| BM752462   | Rho-associated, coiled-coil containing protein kinase 2               | ROCK2    | signal transduction                   | 2       | -2.3 | -1.2 | -1.4 |
| BM752511   | Serine/threonine kinase 17b (apoptosis-inducing)                      | STK17B   | signal transduction                   | 2       | -2.3 | 1.0  | -1.4 |

**Gene expression altered by kaempferol treatment in HaCaT keratinocytes**

| GenBank No | Name                                                                                              | Symbol  | Function                 | Cluster | 3h   | 6h   | 24h  |
|------------|---------------------------------------------------------------------------------------------------|---------|--------------------------|---------|------|------|------|
| AL832591   | Serine/threonine/tyrosine interacting protein                                                     | STYX    | signal transduction      | 2       | -2.3 | -1.3 | -1.4 |
| NM_013257  | Serum/glucocorticoid regulated kinase-like                                                        | SGKL    | signal transduction      | 2       | -2.5 | -1.3 | -1.3 |
| BM785530   | Syndecan 1                                                                                        | SDC1    | signal transduction      | 2       | -2.5 | -1.2 | -1.4 |
| AI089275   | Syndecan 4 (amphiglycan, ryudocan)                                                                | SDC4    | signal transduction      | 3       | -1.3 | -1.5 | -2.4 |
| AI475332   | CCAAT/enhancer binding protein zeta                                                               | CEBPZ   | transcription regulation | 2       | -2.2 | -1.2 | -1.4 |
| BM793777   | MYB binding protein (P160) 1a                                                                     | MYBBP1A | transcription regulation | 2       | -2.4 | -1.2 | 1.0  |
| AK091308   | NMDA receptor regulated 1                                                                         | NARG1   | transcription regulation | 2       | -2.3 | -1.2 | -1.4 |
| BM738548   | SEC14-like 2 ( <i>S. cerevisiae</i> )                                                             | SEC14L2 | transcription regulation | 2       | -2.2 | -1.1 | -1.3 |
| BM747886   | SMAD, mothers against DPP homolog 9 ( <i>Drosophila</i> )                                         | SMAD9   | transcription regulation | 2       | -2.1 | -1.3 | -1.3 |
| BM746522   | SWI/SNF related, matrix associated, actin dependent regulator of chromatin, subfamily e, member 1 | SMARCE1 | transcription regulation | 2       | -2.3 | -1.3 | -1.4 |
| NM_006284  | TAF10 RNA polymerase II, TATA box binding protein (TBP)-associated factor, 30kDa                  | TAF10   | transcription regulation | 2       | -2.5 | -1.3 | -1.0 |
| BM788970   | TAF15 RNA polymerase II, TATA box binding protein (TBP)-associated factor, 68kDa                  | TAF15   | transcription regulation | 2       | -2.2 | -1.1 | -1.5 |
| CB104801   | Thyroid hormone receptor interactor 11                                                            | TRIP11  | transcription regulation | 2       | -2.1 | -1.3 | -1.5 |
| BM788650   | A kinase (PRKA) anchor protein (yotiao) 9                                                         | AKAP9   | transport                | 2       | -2.2 | -1.1 | -1.4 |
| BM742353   | Low density lipoprotein receptor-related protein associated protein 1                             | LRPAP1  | transport                | 2       | -2.2 | -1.1 | -1.4 |
| BM782262   | Polymeric immunoglobulin receptor                                                                 | PIGR    | transport                | 2       | -2.4 | -1.1 | -1.5 |
| NM_031954  | Potassium channel tetramerisation domain containing 10                                            | KCTD10  | transport                | 2       | -2.1 | -1.3 | -1.5 |
| BM744354   | Potassium voltage-gated channel, Isk-related family, member 3                                     | KCNE3   | transport                | 2       | -2.4 | -1.3 | -1.4 |
| BM789500   | Solute carrier family 30 (zinc transporter), member 4                                             | SLC30A4 | transport                | 2       | -2.3 | -1.3 | -1.2 |
| BM756300   | Solute carrier family 31 (copper transporters), member 1                                          | SLC31A1 | transport                | 2       | -2.3 | -1.1 | -1.4 |
| NM_001859  | Solute carrier family 31 (copper transporters), member 1                                          | SLC31A1 | transport                | 2       | -2.7 | -1.3 | -1.4 |

**Gene expression altered by kaempferol treatment in HaCaT keratinocytes**

| GenBank No | Name                                                                            | Symbol   | Function  | Cluster | 3h   | 6h   | 24h  |
|------------|---------------------------------------------------------------------------------|----------|-----------|---------|------|------|------|
| BM787821   | Solute carrier family 31 (copper transporters), member 1                        | SLC31A1  | transport | 2       | -2.3 | -1.3 | -1.5 |
| BM772075   | Solute carrier family 7, (cationic amino acid transporter, y+ system) member 11 | SLC7A11  | transport | 2       | -2.1 | -1.1 | -1.3 |
| BM751070   | Synaptotagmin XIII                                                              | SYT13    | transport | 2       | -2.2 | -1.2 | -1.3 |
| BM755434   | Transmembrane 9 superfamily member 1                                            | TM9SF1   | transport | 2       | -2.4 | -1.2 | -1.4 |
| BM787401   | Coiled-coil-helix-coiled-coil-helix domain containing 1                         | CHCHD1   | unknown   | 1       | 1.6  | 1.3  | 3.0  |
| BM764394   | CTCL tumor antigen se57-1                                                       | SE57-1   | unknown   | 1       | 1.5  | 1.6  | 2.9  |
| BM767070   | Peroxisomal membrane protein 2, 22kDa                                           | PXMP2    | unknown   | 1       | 1.5  | 1.2  | 2.0  |
| AF037630   | Ankyrin repeat and sterile alpha motif domain containing 1                      | ANKS1    | unknown   | 2       | -2.2 | -1.2 | -1.5 |
| BM749164   | Chromosome 6 open reading frame 210                                             | C6orf210 | unknown   | 2       | -2.2 | -1.2 | -1.4 |
| BM743387   | Chromosome 6 open reading frame 69                                              | C6orf69  | unknown   | 2       | -2.4 | -1.1 | -1.3 |
| BQ082124   | Copine VIII                                                                     | CPNE8    | unknown   | 2       | -2.3 | -1.4 | -1.3 |
| BM763955   | Hypoxia-inducible protein 2                                                     | HIG2     | unknown   | 2       | -2.0 | -1.1 | -1.4 |
| BM782016   | Interphase cytoplasmic foci protein 45                                          | ICF45    | unknown   | 2       | -2.3 | -1.1 | -1.6 |
| BM751923   | Intersex-like (Drosophila)                                                      | IXL      | unknown   | 2       | -2.5 | -1.2 | -1.4 |
| BM759265   | CD82 antigen                                                                    | KAI1     | unknown   | 2       | -2.1 | -1.2 | -1.4 |
| AY251274   | Junctophilin 3                                                                  | JPH3     | unknown   | 2       | -2.2 | -1.1 | -1.2 |
| BM788543   | PDZ domain containing, X chromosome                                             | FLJ21687 | unknown   | 2       | -2.4 | -1.3 | -1.4 |
| BM746149   | PQ loop repeat containing 2                                                     | PQLC2    | unknown   | 2       | -2.5 | -1.4 | -1.6 |
| BM751773   | Small EDRK-rich factor 2                                                        | SERF2    | unknown   | 2       | -2.4 | -1.2 | -1.5 |
| BM747039   | Small EDRK-rich factor 2                                                        | SERF2    | unknown   | 2       | -2.4 | -1.1 | -1.5 |
| BM754369   | Thioredoxin interacting protein                                                 | TXNIP    | unknown   | 2       | -2.2 | -1.7 | -1.4 |

Gene expression altered by kaempferol treatment in HaCaT keratinocytes

| GenBank No | Name                            | Symbol | Function | Cluster | 3h   | 6h   | 24h  |
|------------|---------------------------------|--------|----------|---------|------|------|------|
| BM752295   | Thioredoxin interacting protein | TXNIP  | unknown  | 2       | -2.7 | -2.2 | -2.0 |
